# Supplementary material for: Bacterial Communities and Antibiotic Resistance of Potential Pathogens Involved in Food Safety and Public Health in Fish and Water of Lake Karla, Thessaly, Greece
Source: MDPI journal article supplement (doi:10.3390/pathogens11121473), 2022-12-05
Supplement: s1 [file s1]

Table S1. Number of raw and filtered reads and alpha diversity indices of evaluated samples.

| Sample    | Number of reads | Filtered sequences | Observed Features | Shannon |
|-----------|-----------------|--------------------|-------------------|---------|
| C_KARL_A1 | 6,802           | 2,989              | 52                | 4.29    |
| C_KARL_A2 | 4,745           | 4,185              | 68                | 5.23    |
| C_KARL_A3 | 28,726          | 14,209             | 58                | 3.49    |

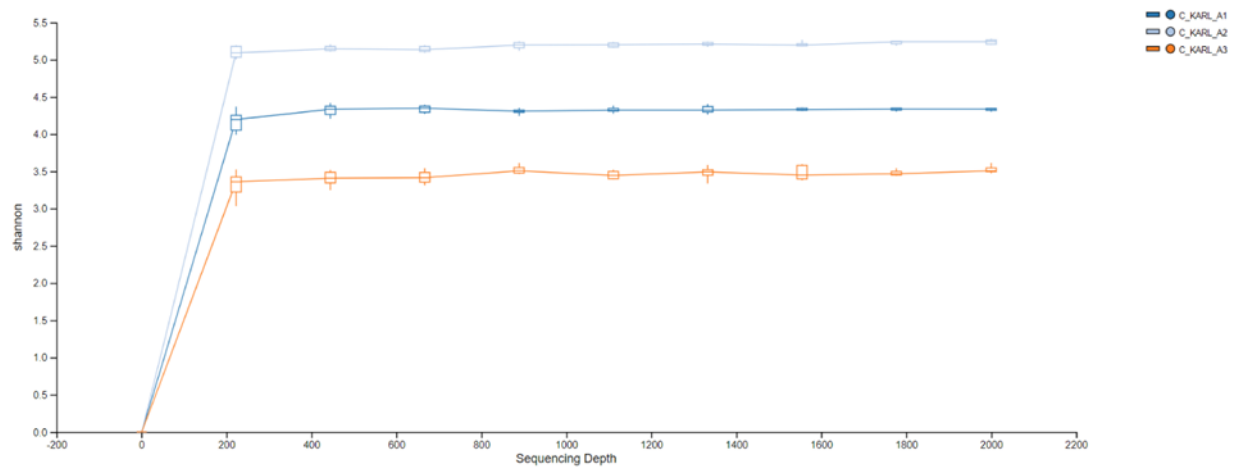

Figure S1. Shannon-Wiener rarefaction curves of the of the fish flesh from the three different areas (A1, A2 and A3) revealed by 16S rRNA metabarcoding analysis through 10 sampling depths.

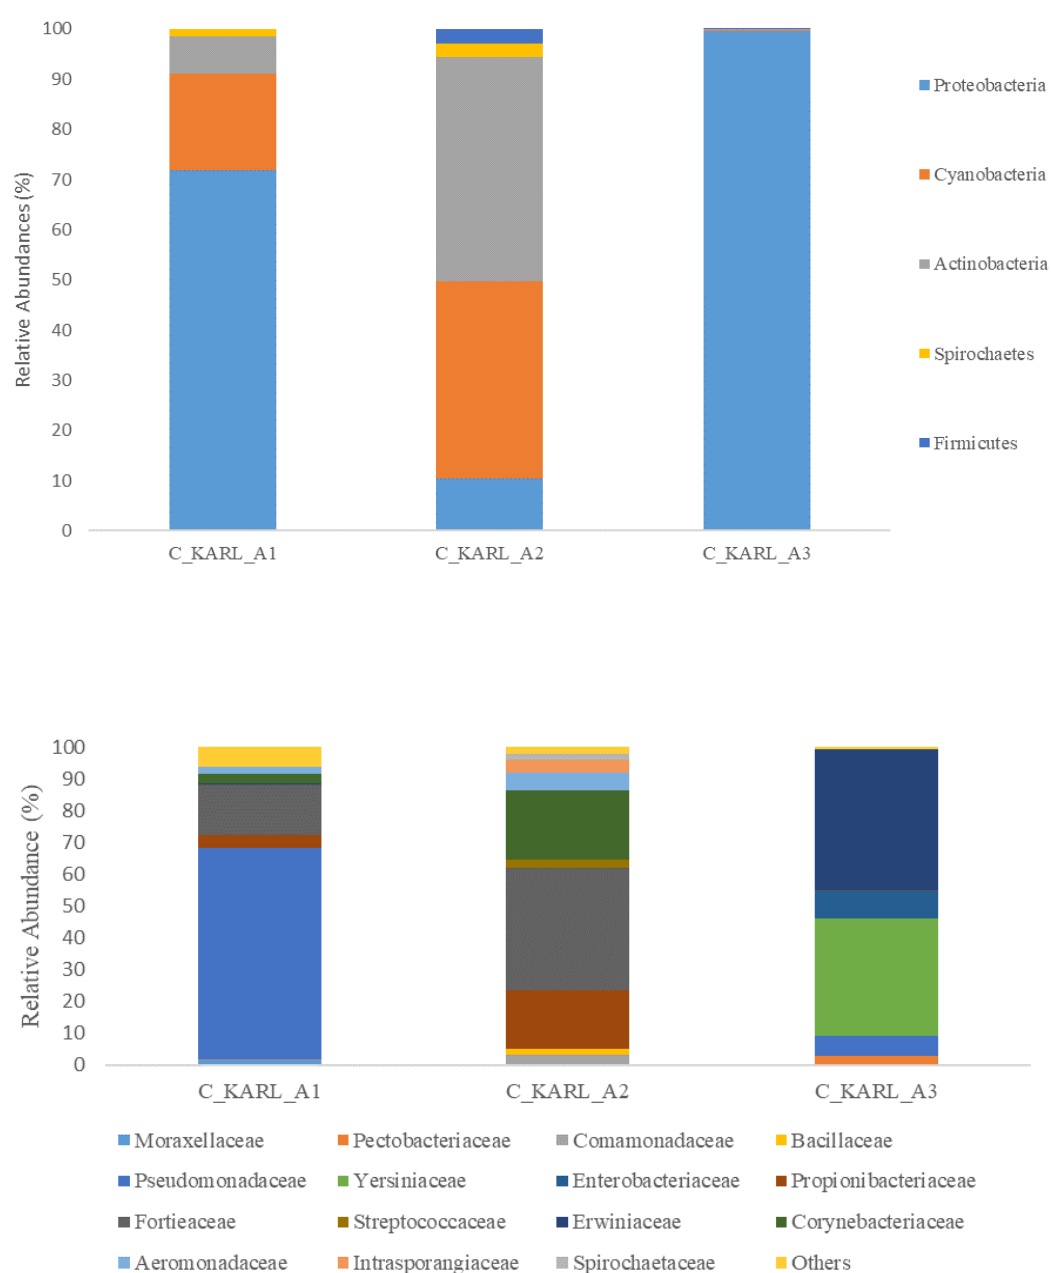

Figure S2. Relative abundance (%) of bacterial phyla (upper) and families (down) of the fish flesh from the three different areas (A1, A2 and A3), as revealed by metabarcoding analysis of 16S rRNA gene.
